# Supplementary material for: Physiologically Based Pharmacokinetic Modelling of Cabotegravir Microarray Patches in Rats and Humans
Source: MDPI journal article supplement (doi:10.3390/pharmaceutics15122709), 2023-11-30
Supplement: s1 [file s1]

# **Physiologically Based Pharmacokinetic Modelling of Cabotegravir Microarray Patches in Rats and Humans**

Hannah Kinvig <sup>1,2</sup>, Rajith K.R. Rajoli <sup>1,2</sup>, Henry Pertinez <sup>1,2</sup>, Lalitkumar K. Vora <sup>3</sup>, Fabiana Volpe-Zanutto <sup>3</sup>, Ryan F. Donnelly <sup>3</sup>, Steve Rannard <sup>2,4</sup>, Charles Flexner <sup>5</sup>, Marco Siccardi <sup>1</sup>, Andrew Owen <sup>1,2,\*</sup>

<sup>1</sup>Department of Pharmacology and Therapeutics, Institute of Systems, Molecular and Integrative Biology, University of Liverpool, Liverpool L7 3NY, UK

<sup>2</sup>Centre of Excellence in Long-Acting Therapeutics (CELT), University of Liverpool, Liverpool L7 3NY, UK

<sup>3</sup>School of Pharmacy, Queen's University Belfast, Medical Biology Centre, 97 Lisburn Road, Belfast BT9 7BL, UK.

<sup>4</sup>Department of Chemistry, University of Liverpool, Liverpool L7 3NY, UK

<sup>5</sup>Department of Pharmacology and Molecular Sciences, Johns Hopkins School of Medicine, Baltimore, MD 21205, USA.

\*Correspondence: [aowen@liverpool.ac.uk](mailto:aowen@liverpool.ac.uk); Tel.: +44-(0)-151-794-8211

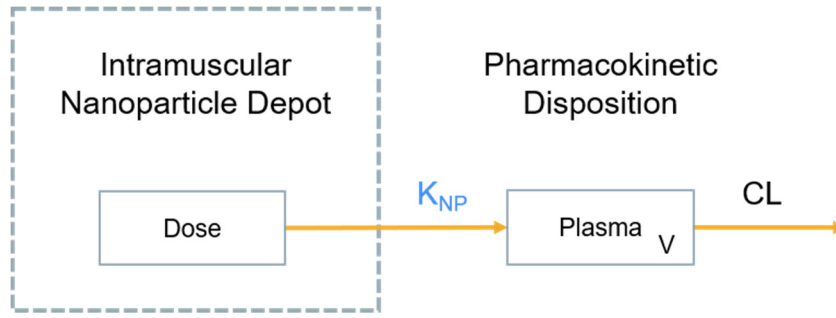

**Figure S1.** Schematic representation of the one-compartment empirical model describing the pharmacokinetic disposition of nanoformulated cabotegravir after intramuscular administration. Parameters highlighted in blue were implemented into the PBPK model.  $K_{NP}$ ,  $V$  and  $CL$  represent the nanoparticle release rate, plasma compartment volume and clearance, respectively.

**Equation S1.** One-compartment empirical model.

$$\frac{dDose}{dt} = -K_{NP} \times Dose \quad (1)$$

$$\frac{dPlasma}{dt} = K_{NP} \times Dose/V - CL \times Plasma \quad (2)$$

Where  $K_{NP}$ ,  $V$  and  $CL$  are the nanoparticle release rate, plasma compartment volume and clearance, respectively.

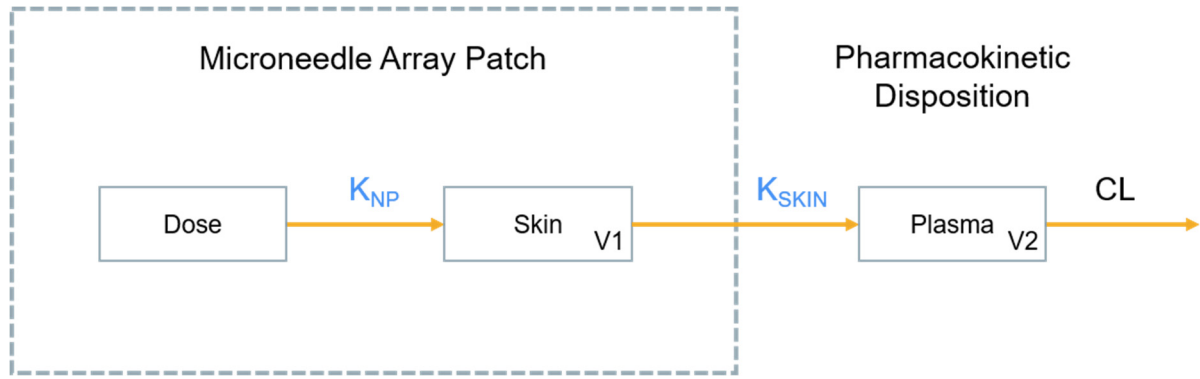

**Figure S2.** Schematic representation of the two-compartment empirical model describing the pharmacokinetic disposition of nanoformulated cabotegravir after microneedle array patch administration. Parameters highlighted in blue were implemented into the PBPK model.  $K_{NP}$ ,  $K_{SKIN}$ ,  $V1$ ,  $V2$  and  $CL$  represent the nanoparticle release rate, rate of drug movement in the skin, skin compartment volume, plasma compartment volume and clearance, respectively.

**Equation S2.** Two-compartment empirical model.

$$\frac{dDose}{dt} = -K_{NP} \times Dose \quad (3)$$

$$\frac{dSkin}{dt} = K_{NP} \times Dose/V1 - K_{SKIN} \times Skin/V1 \quad (4)$$

$$\frac{dPlasma}{dt} = K_{SKIN} \times Skin/V1 - CL \times Plasma/V2 \quad (5)$$

Where  $K_{NP}$ ,  $V1$ ,  $V2$  and  $CL$  are the nanoparticle release rate, skin compartment volume, plasma compartment volume and clearance, respectively.

**Table S1.** MAP intradermal PBPK model parameters.

| Equation                                                               | Description                                                               |
|------------------------------------------------------------------------|---------------------------------------------------------------------------|
| <b>Skin Characteristics</b>                                            |                                                                           |
| $V_{SC} = V_{tBP,SC} - V_{tMN,SC}$                                     | Volume of skin in the stratum corneum within the boundaries of the MAP    |
| $V_{VE} = V_{tBP,VE} - V_{tMN,VE}$                                     | Volume of skin in the viable epidermis within the boundaries of the MAP   |
| $V_{DE} = V_{tBP,DE} - V_{tMN,DE}$                                     | Volume of skin in the dermis within the boundaries of the MAP             |
| $V_{BP,SC} = BP_W \times BP_L \times T_{SC}$                           | Volume of the stratum corneum within the boundaries of one MAP baseplate  |
| $V_{BP,VE} = BP_W \times BP_L \times T_{VE}$                           | Volume of the viable epidermis within the boundaries of one MAP baseplate |
| $V_{BP,DE} = BP_W \times BP_L \times T_{DE}$                           | Volume of the viable epidermis within the boundaries of one MAP baseplate |
| $V_{tBP,SC} = V_{BP,SC} \times BP_t$                                   | Volume of stratum corneum within the boundaries of total MAP baseplates   |
| $V_{tBP,VE} = V_{BP,VE} \times BP_t$                                   | Volume of viable epidermis within the boundaries of total MAP baseplates  |
| $V_{tBP,DE} = V_{BP,DE} \times BP_t$                                   | Volume of dermis within the boundaries of total MAP baseplates            |
| $T_{SC} = 17 \mu\text{M}$ (human), $T_{SC} = 18 \mu\text{M}$ (rat)     | Thickness of the <i>stratum corneum</i> [1]                               |
| $T_{VE} = 47 \mu\text{M}$ (human), $T_{SC} = 32 \mu\text{M}$ (rat)     | Thickness of the viable epidermis [1]                                     |
| $T_{DE} = 2906 \mu\text{M}$ (human), $T_{SC} = 2040 \mu\text{M}$ (rat) | Thickness of the dermis [1]                                               |
| <b>MAP Characteristics</b>                                             |                                                                           |
| $BP_{MN} = 256$                                                        | Number of microneedles per $16 \times 16$ baseplate [2]                   |
| $BP_t = \text{Dose}/BP_{\text{LOADING}}$                               | Number of baseplates in MAP, based on dose                                |

|                                                               |                                                                                                                                                |
|---------------------------------------------------------------|------------------------------------------------------------------------------------------------------------------------------------------------|
| $BP_L = 0.7 \text{ cm}$                                       | Baseplate length [2]                                                                                                                           |
| $BP_W = 0.7 \text{ cm}$                                       | Baseplate width [2]                                                                                                                            |
| $MN_H = 600/10000$                                            | Microneedle height (cm) [2]                                                                                                                    |
| $MN_W = 300/10000$                                            | Microneedle width (cm) [2]                                                                                                                     |
| $MN_L = 300/10000$                                            | Microneedle length (cm) [2]                                                                                                                    |
| $MN_{H,SC} = T_{SC}$                                          | Height of a microneedle in the <i>stratum corneum</i>                                                                                          |
| $MN_{H,VE} = T_{VE}$                                          | Height of a microneedle in the viable epidermis                                                                                                |
| $MN_{H,DE} = MN_H - T_{SC} - T_{VE}$                          | Height of a microneedle in the dermis, based on the remaining microneedle height after <i>stratum corneum</i> and viable epidermis penetration |
| $MN_{W,DE} = MN_W \times MN_{H,DE}/MN_H$                      | Width of a microneedle in the dermis, based on the fraction of microneedle height                                                              |
| $MN_{L,DE} = MN_L \times MN_{H,DE}/MN_H$                      | Length of a microneedle in the dermis, based on the fraction of microneedle height                                                             |
| $MN_{H,VEDE} = MN_{H,VE} + MN_{H,DE}$                         | Height of a microneedle in the viable epidermis and dermis                                                                                     |
| $MN_{W,VEDE} = MN_W \times (MN_{H,DE} + MN_{H,VE})/MN_H$      | Width of a microneedle in the viable epidermis and dermis, based on the fraction of microneedle height                                         |
| $MN_{L,VEDE} = MN_L \times (MN_{H,DE} + MN_{H,VE})/MN_H$      | Length of a microneedle in the viable epidermis and dermis, based on the fraction of microneedle height                                        |
| $V_{MN} = (MN_H \times MN_W \times MN_L)/3$                   | Volume of one microneedle                                                                                                                      |
| $V_{MN,SC} = V_{MN} - V_{MN,VEDE}$                            | Volume of one microneedle in the <i>stratum corneum</i>                                                                                        |
| $V_{tMN,SC} = V_{MN,SC} \times BP_{MN} \times BP_t$           | Volume of total microneedles in the <i>stratum corneum</i>                                                                                     |
| $V_{MN,VE} = V_{MN,VEDE} - V_{MN,DE}$                         | Volume of one microneedle in the viable epidermis                                                                                              |
| $V_{tMN,VE} = V_{MN,DE} \times BP_{MN} \times BP_t$           | Volume of total microneedles in the viable epidermis                                                                                           |
| $V_{MN,DE} = (MN_{H,DE} \times MN_{W,DE} \times MN_{L,DE})/3$ | Volume of one microneedle in the dermis                                                                                                        |

|                                                                                                                                                                                                                                                                                                                                                                                                                                                    |                                                                           |
|----------------------------------------------------------------------------------------------------------------------------------------------------------------------------------------------------------------------------------------------------------------------------------------------------------------------------------------------------------------------------------------------------------------------------------------------------|---------------------------------------------------------------------------|
| $V_{tMN,DE} = V_{MN,DE} \times BP_{MN} \times BP_t$                                                                                                                                                                                                                                                                                                                                                                                                | Volume of total microneedles in the dermis                                |
| $V_{MN,VEDE} = (MN_{H,VEDE} \times MN_{W,VEDE} \times MN_{L,VEDE})/3$                                                                                                                                                                                                                                                                                                                                                                              | Volume of one microneedle in the viable epidermis and dermis              |
| $SA_{MN} = MN_H \times MN_W + MN_L \sqrt{(MN_W/2)^2 + MN_H^2} + MN_W \sqrt{(MN_L/2)^2 + MN_H^2}$                                                                                                                                                                                                                                                                                                                                                   | Surface area of one microneedle                                           |
| $SA_{MN,SC} = SA_{MN} - SA_{MN,VEDE}$                                                                                                                                                                                                                                                                                                                                                                                                              | Surface area of one microneedle in the <i>stratum corneum</i>             |
| $SA_{tMN,SC} = SA_{MN,SC} \times BP_{MN} \times BP_t$                                                                                                                                                                                                                                                                                                                                                                                              | Surface area of total microneedles in the <i>stratum corneum</i>          |
| $SA_{MN,VE} = SA_{MN,VEDE} - SA_{MN,DE}$                                                                                                                                                                                                                                                                                                                                                                                                           | Surface area of one microneedle in the viable epidermis                   |
| $SA_{tMN,VE} = SA_{MN,VE} \times BP_{MN} \times BP_t$                                                                                                                                                                                                                                                                                                                                                                                              | Surface area of total microneedles in the viable epidermis                |
| $SA_{MN,DE} = MN_{H,DE} \times MN_{W,DE} + MN_{L,DE} \sqrt{(MN_{W,DE}/2)^2 + MN_{H,DE}^2} + MN_{W,DE} \sqrt{(MN_{L,DE}/2)^2 + MN_{H,DE}^2}$                                                                                                                                                                                                                                                                                                        | Surface area of one microneedle in the dermis                             |
| $SA_{tMN,DE} = SA_{MN,DE} \times BP_{MN} \times BP_t$                                                                                                                                                                                                                                                                                                                                                                                              | Surface area of total microneedles in the dermis                          |
| $SA_{MN,VEDE} = MN_{H,VEDE} \times MN_{W,VEDE} + MN_{L,VEDE} \sqrt{(MN_{W,VEDE}/2)^2 + MN_{H,VEDE}^2} + MN_{W,VEDE} \sqrt{(MN_{L,VEDE}/2)^2 + MN_{H,VEDE}^2}$                                                                                                                                                                                                                                                                                      | Surface area of one microneedle in the viable epidermis and dermis        |
| <b>Dermis Blood Flow</b>                                                                                                                                                                                                                                                                                                                                                                                                                           |                                                                           |
| $Q_{DE} = V_{tBP,DE} \times (Q_{DERMIS} \times 60 \times 60/1000)$                                                                                                                                                                                                                                                                                                                                                                                 | Blood flow rate in the dermis within the boundary of total MAP baseplates |
| $Q_{DERMIS} = 0.0022 \text{ cm}^3 \text{ blood/s/cm}^3 \text{ skin}$                                                                                                                                                                                                                                                                                                                                                                               | Blood flow rate in the dermis [3]                                         |
| Microneedle characteristics based on a right rectangular pyramid shape, as previously described [2]. References presented in square brackets in the description column, where applicable. V - volume, t - total, BP - baseplate, MN - microneedle, SC - <i>stratum corneum</i> , VE - viable epidermis, DE - dermis, VEDE - viable epidermis and dermis, W - width, L - length, H - height, T - thickness, SA - surface area, Q – blood flow rate. |                                                                           |

## References

1. Wei, J.C.J.; Edwards, G.A.; Martin, D.J.; Huang, H.; Crichton, M.L.; Kendall, M.A.F. Allometric scaling of skin thickness, elasticity, viscoelasticity to mass for micro-medical device translation: from mice, rats, rabbits, pigs to humans. *Sci Rep* **2017**, *7*, 15885, doi:<https://doi.org/10.1038/s41598-017-15830-7>.
2. Tekko, I.A.; Vora, L.K.; Volpe-Zanutto, F.; Moffatt, K.; Jarrahian, C.; McCarthy, H.O.; Donnelly, R.F. Novel Bilayer Microarray Patch-Assisted Long-Acting Micro-Depot Cabotegravir Intradermal Delivery for HIV Pre-Exposure Prophylaxis. *n/a*, 2106999, doi:<https://doi.org/10.1002/adfm.202106999>.
3. Ibrahim, R.; Nitsche, J.M.; Kasting, G.B. Dermal clearance model for epidermal bioavailability calculations. *J Pharm Sci* **2012**, *101*, 2094-2108, doi:<https://doi.org/10.1002/jps.23106>.
